# Supplementary material for: LncRNA LINC01503 aggravates the progression of cervical cancer through sponging miR-342-3p to mediate FXYD3 expression
Source: PubMed Central journal article supplement (PMC7286873; doi:10.1042/bsr20193371), 2020-06-10
Supplement: BSR-2019-3371_supp.pdf [file BSR-2019-3371_supp.pdf]

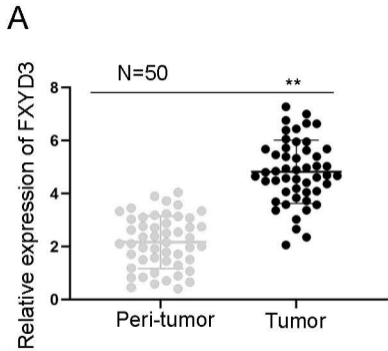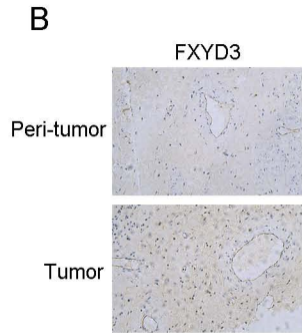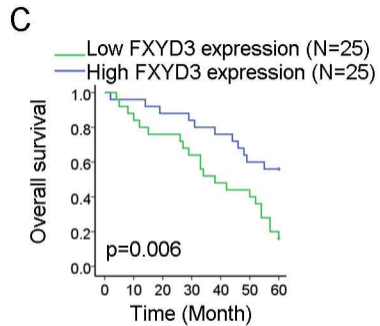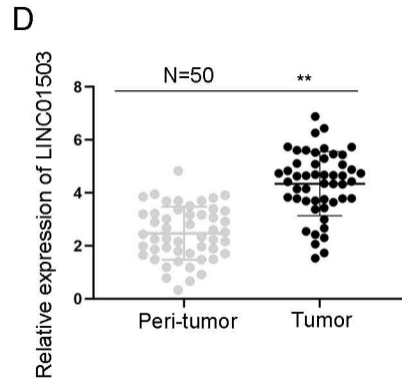

### **Supplementary Figure 1**

(A-B) FX3 expression in CC tissues and peri-tumor was examined via RT-qPCR and IHC. (C) The association between FX3 expression and overall survival of CC patients was analyzed via Kaplan-Meier analysis. (D) LINC01503 expression in CC tissues and peri-tumor was examined via RT-qPCR. \*\* P < 0.01.
